# Supplementary material for: Neurocognitive mechanisms underlying action tool knowledge tasks: specificity of tool-tool compared to hand-tool compatibility tasks
Source: Springer Nature journal article supplement (doi:10.1038/s42003-025-07923-1), 2025-04-03
Supplement: MOESM1 [file 42003_2025_7923_MOESM1_ESM.pdf]

**Lesourd, Osiurak, Martin, Hague, Laroze, Clément, Medeiros de Bustos, Fargeix,  
Magnin and Moulin**

Neurocognitive mechanisms underlying action tool knowledge tasks: specificity of tool-  
tool compared to hand-tool compatibility tasks

***Supplementary material***

**Supplementary table 1.** Object pairs (related and unrelated) used in the tool-tool compatibility task (Experiment 1)

| <i>corkscrew</i><br><i>bank card</i> | <i>dart</i><br><i>plug</i> | <i>spinning top</i><br><i>stamp</i> | <i>spray</i><br><i>highlighter</i> |
|--------------------------------------|----------------------------|-------------------------------------|------------------------------------|
|                                      | <b>tap</b>                 | megaphone                           | kitchen scale                      |
| light bulb                           | 3.75 (.87)                 | 1.17 (.39)                          | 1.08 (.29)                         |
|                                      | grater                     | <b>timer</b>                        | trowel                             |
| key                                  | 1.33 (.65)                 | 4.33 (.65)                          | 1.58 (.90)                         |
|                                      | door handle                | padlock                             | <b>scraper</b>                     |
| saw                                  | 1.33 (.65)                 | 1.67 (1.07)                         | 3.75 (.87)                         |
|                                      | USB key                    | <b>lemon squeezer</b>               | hand gun                           |
| compass                              | 2.33 (.98)                 | 3.83 (1.03)                         | 1.17 (.39)                         |
|                                      | bolt                       | lighter                             | <b>drumstick</b>                   |
| hammer                               | 1.58 (.67)                 | 1.42 (.67)                          | 3.33 (.98)                         |
|                                      | suitcase                   | hanger                              | <b>tongs</b>                       |
| eyedropper                           | 1.08 (.29)                 | 1.17 (.39)                          | 4.08 (1.00)                        |
|                                      | <b>shears</b>              | candle                              | coffee machine                     |
| clothespin                           | 4.17 (.58)                 | 1.33 (.65)                          | 1.25 (.62)                         |
|                                      | <b>timer</b>               | scissors                            | Christmas ball                     |
| screwdriver                          | 4.08 (.67)                 | 1.67 (1.15)                         | 1.17 (.39)                         |
|                                      | plectrum                   | <b>measuring glass</b>              | golf ball                          |
| coffee maker                         | 1.25 (.45)                 | <b>4.75 (.45)</b>                   | 1.33 (.49)                         |
|                                      | wall stapler               | <b>music box</b>                    | drill                              |
| meat grinder                         | 2.25 (.62)                 | <b>4.58 (.51)</b>                   | 1.50 (.52)                         |
|                                      | <b>paper plane</b>         | jug                                 | chopper                            |
| hand grenade                         | <b>3.00 (.85)</b>          | 1.08 (.29)                          | 1.08 (.29)                         |
|                                      | protractor                 | rake                                | <b>stapler</b>                     |
| horn                                 | 1.17 (.39)                 | 1.33 (.89)                          | <b>4.58 (.51)</b>                  |

Italic items were used as examples

Target items appear on the left whereas associated items are represented in bold

Values represent mean ratings and standard deviations of the mean for the manipulation dimension

Ratings for the related pairs were significantly higher than for the unrelated pairs (all  $ps < .0001$ )

**Lesourd, Osiurak, Martin, Hague, Laroze, Clément, Medeiros de Bustos, Fargeix,  
Magnin and Moulin**

Neurocognitive mechanisms underlying action tool knowledge tasks: specificity of tool-  
tool compared to hand-tool compatibility tasks

**Supplementary table 2.** Means and standard deviations for each task of Experiment 2

|           | Accuracy (%) |           | RTs (ms)    |           |
|-----------|--------------|-----------|-------------|-----------|
|           | <i>mean</i>  | <i>sd</i> | <i>mean</i> | <i>sd</i> |
| Hand-Tool | 88           | 9         | 4038        | 194       |
| Tool-Tool | 79           | 15        | 4444        | 153       |
| RTM       | 94           | 9         | 3999        | 135       |
| VI        | 87           | 18        | 2598        | 123       |
| MI        | 89           | 12        | 2194        | 913       |

RTM: recognition of tool manipulation; MI: motor imagery task; VI: visual imagery task

**Lesourd, Osiurak, Martin, Hague, Laroze, Clément, Medeiros de Bustos, Fargeix,  
Magnin and Moulin**

Neurocognitive mechanisms underlying action tool knowledge tasks: specificity of tool-  
tool compared to hand-tool compatibility tasks

**Supplementary table 3.** Object pairs (related and unrelated) used in the tool-tool compatibility task (Experiment 3)

| Target objects | related            | unrelated      |
|----------------|--------------------|----------------|
| bottle opener  | water fountain     | sword          |
| hand vacuum    | paint roller       | hammer         |
| squeeggee      | tennis racket      | nutcracker     |
| knife          | spatula            | mouse computer |
| calculator     | switch             | salt shaker    |
| match          | brush              | dumbbells      |
| saw            | iron               | tap            |
| rub            | nail file          | chess king     |
| guitar         | fan                | syringe        |
| rattle         | lasso              | snap hook      |
| stapler        | nail clippers      | chalk          |
| screwdriver    | nutcracker         | pan            |
| light bulb     | corkscrew          | pitcher        |
| gun            | spray bottle       | petanque balls |
| chopper        | fishing rod        | shears         |
| scissors       | garlic press       | dice           |
| pickaxe        | whip               | watering can   |
| wrench         | doorknob           | bucket         |
| fly swatter    | pingpong racket    | boomerang      |
| tin can        | grenade            | needle         |
| masher         | ski stick          | feather duster |
| pepper mill    | rotating hose reel | plastic bag    |
| key            | timer              | dart           |
| plug           | credit card        | spinning top   |
| kitchen whisk  | salad spinner      | trowel         |
| clothespin     | staple remover     | measuring tape |
| rake           | peeling knife      | ladle          |

**Supplementary table 4.** Object pairs used in the control condition of the tool-tool task (Experiment 3)

| colored black surface pairs |                        | no colored black surface pairs |             |
|-----------------------------|------------------------|--------------------------------|-------------|
| <u>wrench</u>               | sponge                 | pickaxe                        | corkscrew   |
| fly swatter                 | <u>push mower</u>      | key                            | chainsaw    |
| <u>tin can</u>              | slicing machine        | kitchen whisk                  | synthesizer |
| masher                      | <u>laptop computer</u> | clothespin                     | triangle    |
| <u>pepper mill</u>          | lighter                | jackhammer                     | drill       |
| plug                        | <u>eraser</u>          | mosquito net                   | saber       |
| <u>rake</u>                 | paper clip             | potato ricer                   | cutter      |
| icebox                      | <u>meat grinder</u>    | whip                           | flashlight  |

Objects that contain a black colored surface are underlined

Neurocognitive mechanisms underlying action tool knowledge tasks: specificity of tool-  
tool compared to hand-tool compatibility tasks

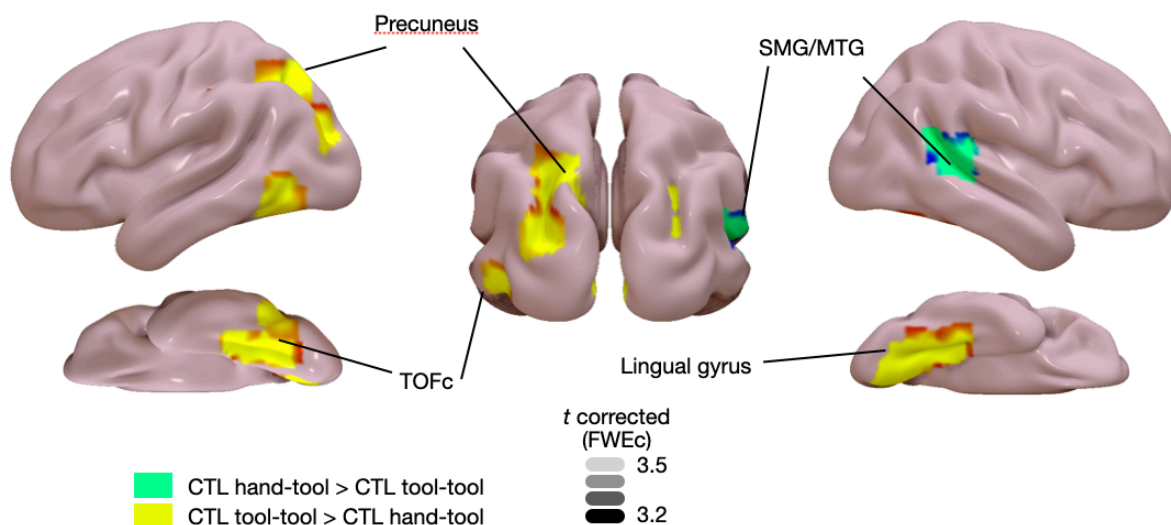

**Supplementary figure 1.** Statistical maps for the comparison between control conditions (Experiment 3). Control\_Hand-Tool > Control\_Tool-Tool and Control\_Tool-Tool > Control\_Hand-Tool contrasts are projected on MNI cortical surface and are FWE-corrected ( $p < .05$ ) for multiple comparisons across the whole-brain at the cluster level. SMG: supramarginal gyrus; MTG: middle temporal gyrus; TOFc: temporal occipital fusiform cortex.

**Supplementary table 5.** Local maxima of activation clusters (MNI stereotactic coordinates) for the individual contrasts between control conditions (Experiment 3)

| Brain region                            | Hemisphere | Peak MNI coordinates |     |     | Cluster size | T-value | PFWE  |
|-----------------------------------------|------------|----------------------|-----|-----|--------------|---------|-------|
|                                         |            | x                    | y   | z   |              |         |       |
| <i>CTL Hand-Tool &gt; CTL Tool-Tool</i> |            |                      |     |     |              |         |       |
| SMG/MTG                                 | Right      | 51                   | -39 | 11  | 74           | 4.64    | .029  |
| <i>CTL Tool-Tool &gt; CTL Hand-Tool</i> |            |                      |     |     |              |         |       |
| Cerebellar Vermis VI                    | Left/Right | 1                    | -71 | -26 | 103          | 8.15    | <.001 |
| Lingual gyrus                           | Right      | 10                   | -69 | -5  | 601          | 7.38    | <.001 |
| TOFc                                    | Left       | -29                  | -50 | -10 | 195          | 5.50    | <.001 |
| Precuneus                               | Left       | -22                  | -60 | 31  | 412          | 5.49    | <.001 |
| Cerebellar X                            | Right      | 26                   | -37 | -47 | 84           | 5.29    | .007  |
| SMG                                     | Left       | -36                  | -37 | 34  | 66           | 4.07    | .017  |

All results are thresholded at  $p < .05$  (FWE, cluster level)

Brain region labels are given according the Harvard-Oxford Cortical and Subcortical Structural Atlas

SMG: supramarginal gyrus; MTG: middle temporal gyrus; TOFc: temporo-occipital fusiform cortex;
